# Supplementary material for: Metal and light free “click” hydrogels for prevention of post-operative peritoneal adhesions
Source: Royal Society of Chemistry journal article supplement (doi:10.1039/c3py01358h), 2013-11-11
Supplement: c3py01358h.pdf [file c3py01358h.pdf]

## Supporting Information for

# Metal and Light Free “Click” Hydrogels for Prevention of Postoperative Peritoneal Adhesions

Weipu Zhu, Lilong Gao, Qiaojie Luo, Chen Gao, Guangyu Zha, Zhiquan Shen,  
Xiaodong Li\*

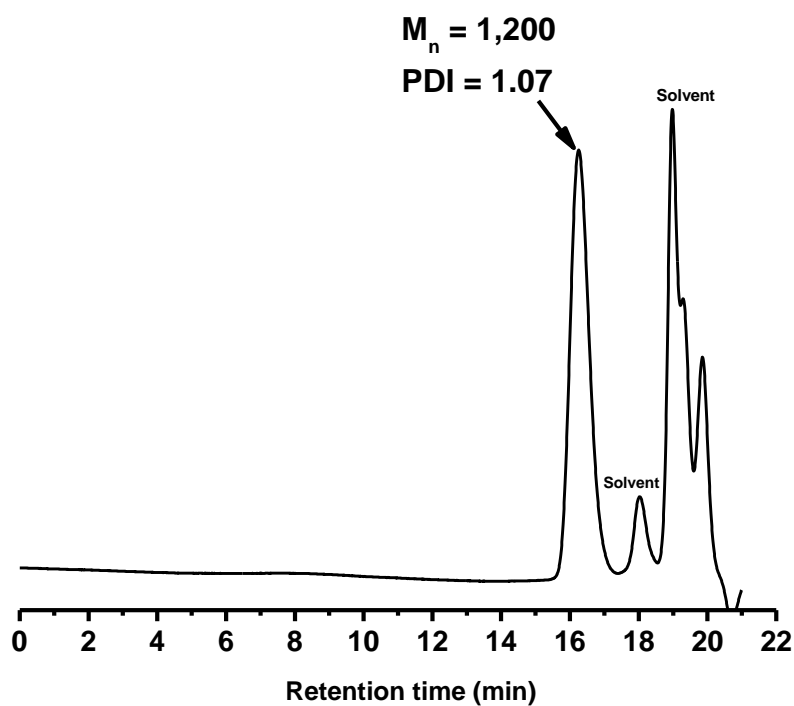

**Figure S1.** GPC curve of control experiment product only with DHPEG ( $M_n = 1000$ ) in the presence of  $\text{Sc}(\text{OTf})_3$  under the same conditions (120 °C, 0.3-3 mmHg, 12 h).
